# Supplementary material for: Implementation of the ORACLE (v1.0) organic aerosol composition and evolution module into the EC-Earth3-AerChem model
Source: Copernicus journal article supplement (doi:10.5194/egusphere-2026-37), 2026-01-22
Supplement: Supplementary file 1 [file egusphere-2026-37-supplement.pdf]

# **Implementation of the ORACLE (v1.0) organic aerosol composition and evolution module into the EC-Earth3-AerChem model**

## **Supporting Information**

Stylios Kakavas<sup>1</sup>, Stelios Myriokefalitakis<sup>2\*</sup>, Alexandra P. Tsimpidi<sup>3</sup>, Vlassis A. Karydis<sup>3</sup>, and Spyros N. Pandis<sup>1,4\*</sup>

1. Institute of Chemical Engineering Sciences, Foundation for Research and Technology Hellas, Patras, Greece
2. Institute for Environmental Research and Sustainable Development (IERSD), National Observatory of Athens, Penteli, Greece
3. Institute for Energy and Climate Research, IEK-8 Troposphere, Forschungszentrum Jülich GmbH, Jülich, Germany
4. Department of Chemical Engineering, University of Patras, Patras, Greece

*\*Correspondence to:* Spyros N. Pandis (spyros@chemeng.upatras.gr) and Stelios Myriokefalitakis (steliosm@noa.gr).

Number of tables: 1

Number of figures: 13

**Table S1:** Global average surface concentrations of POA, SOA-sv, SOA-iv, and total OA from standalone TM5-MP simulation using the VBS configuration, presented for annual, DJF, MAM, JJA, and SON periods

| OA            | Annual                   | DJF                      | MAM                      | JJA                      | SON                      |
|---------------|--------------------------|--------------------------|--------------------------|--------------------------|--------------------------|
|               | ( $\mu\text{g m}^{-3}$ ) |
| <b>TM5-MP</b> |                          |                          |                          |                          |                          |
| POA           | 0.32                     | 0.40                     | 0.24                     | 0.33                     | 0.32                     |
| SOA-sv        | 0.14                     | 0.10                     | 0.14                     | 0.17                     | 0.15                     |
| SOA-iv        | 0.30                     | 0.38                     | 0.27                     | 0.26                     | 0.30                     |
| Total OA      | 1.07                     | 1.09                     | 0.91                     | 1.16                     | 1.11                     |

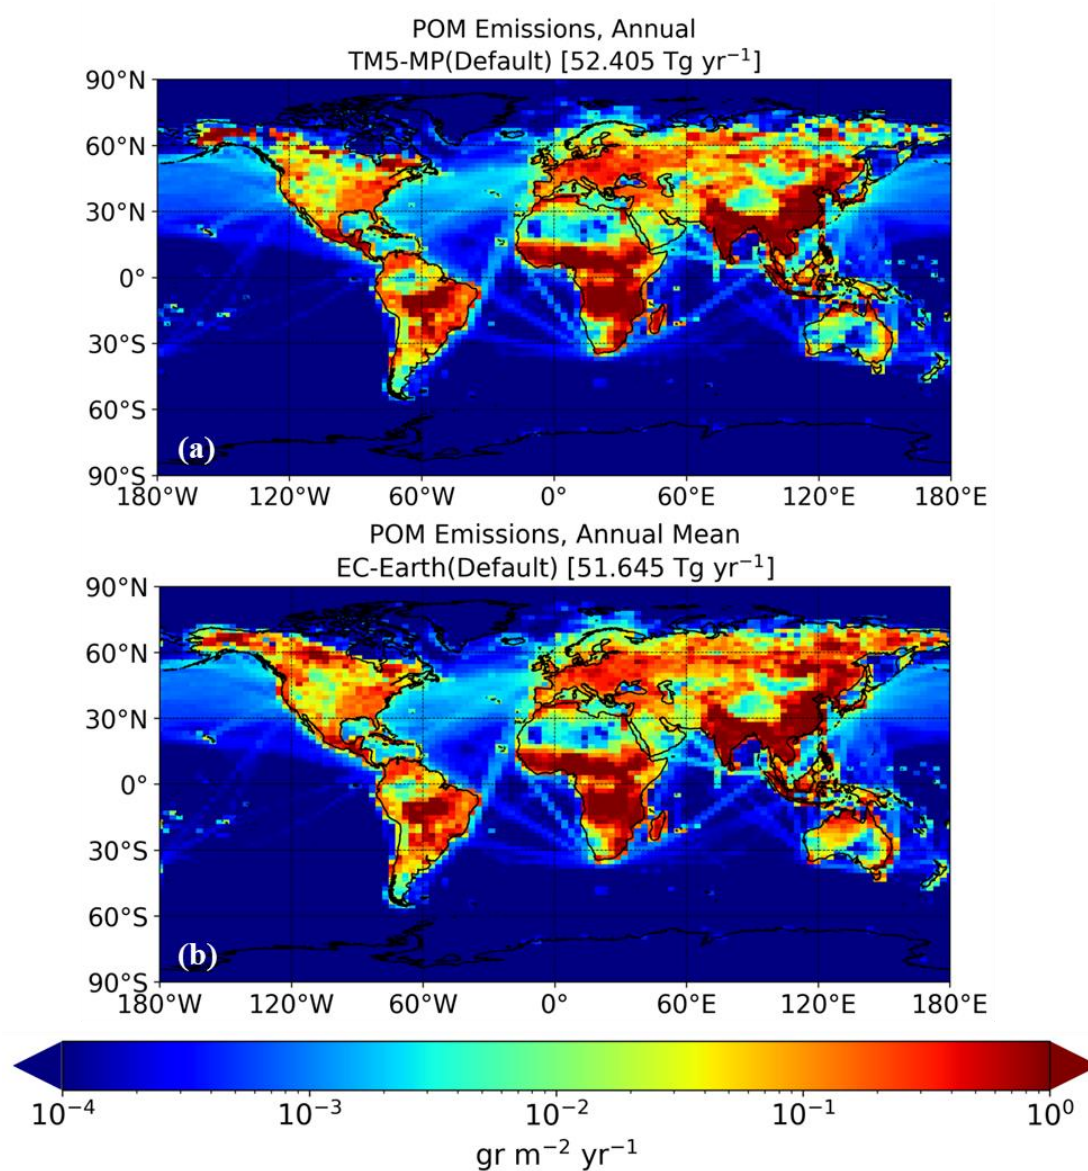

**Figure S1.** Annual POA emissions (in gr m<sup>-2</sup> yr<sup>-1</sup>) applied in the default simulation of: **(a)** standalone TM5-MP during 2005, and **(b)** EC-Earth during 2000-2010.

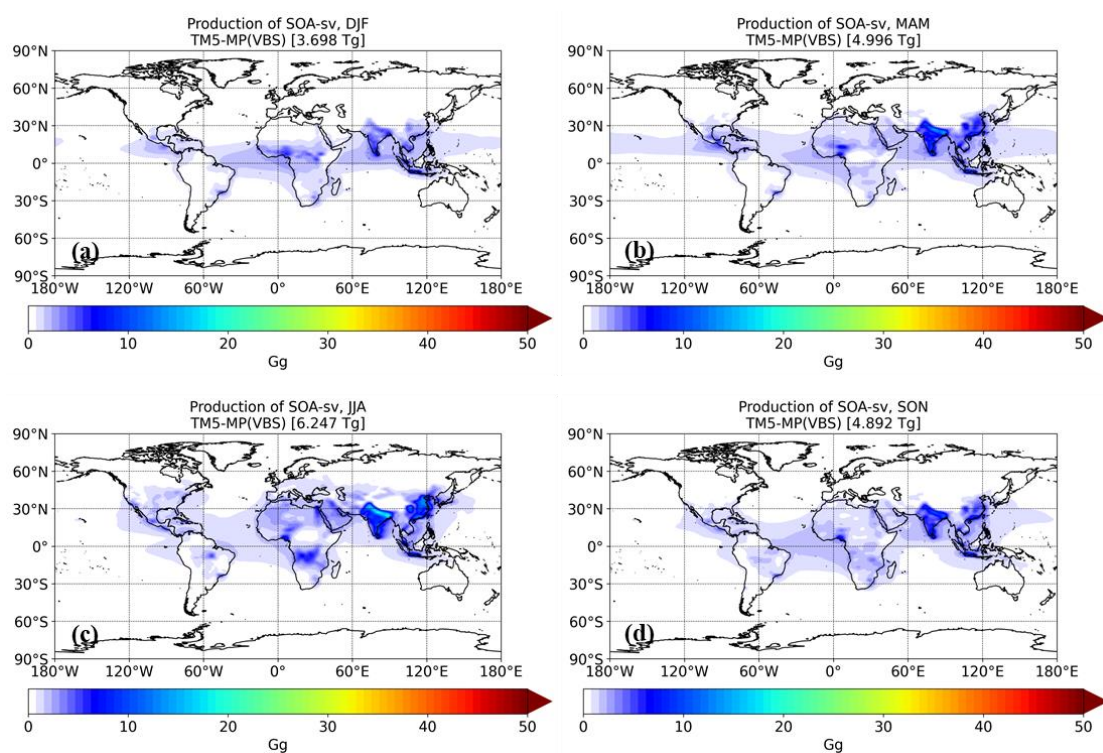

**Figure S2.** Production of SOA-sv as simulated using the VBS configuration in TM5-MP during 2005 (in Gg) for: **(a)** DJF, **(b)** MAM, **(c)** JJA, and **(d)** SON.

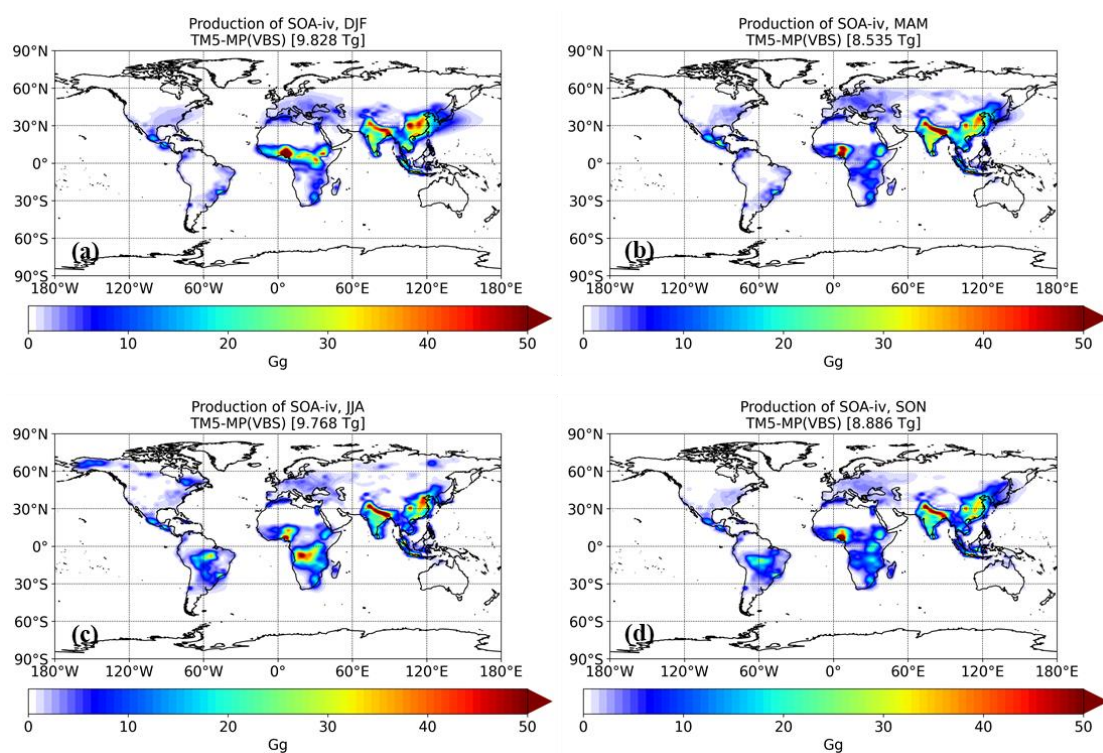

**Figure S3.** Production of SOA-iv as simulated using the VBS configuration in TM5-MP during 2005 (in Gg) for: **(a)** DJF, **(b)** MAM, **(c)** JJA, and **(d)** SON.

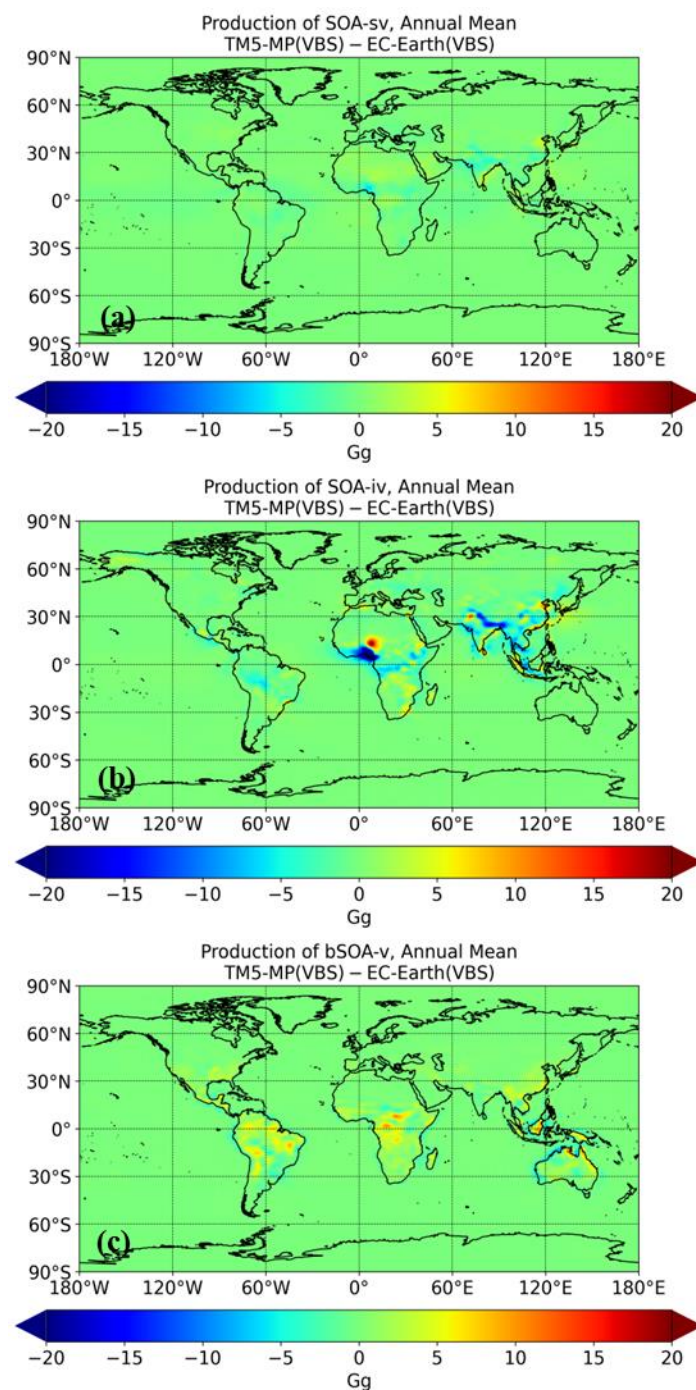

**Figure S4.** Annual mean differences in SOA production between TM5-MP and EC-Earth simulations during 2005 using the VBS configuration (in Gg) for: **(a)** SOA-sv, and **(b)** SOA-iv. For completeness, the difference in annual SOA production from biogenic VOCs (bSOA-v) in panel **(c)** is also shown. A positive change indicates that the standalone TM5-MP simulation predicts higher production than the EC-Earth.



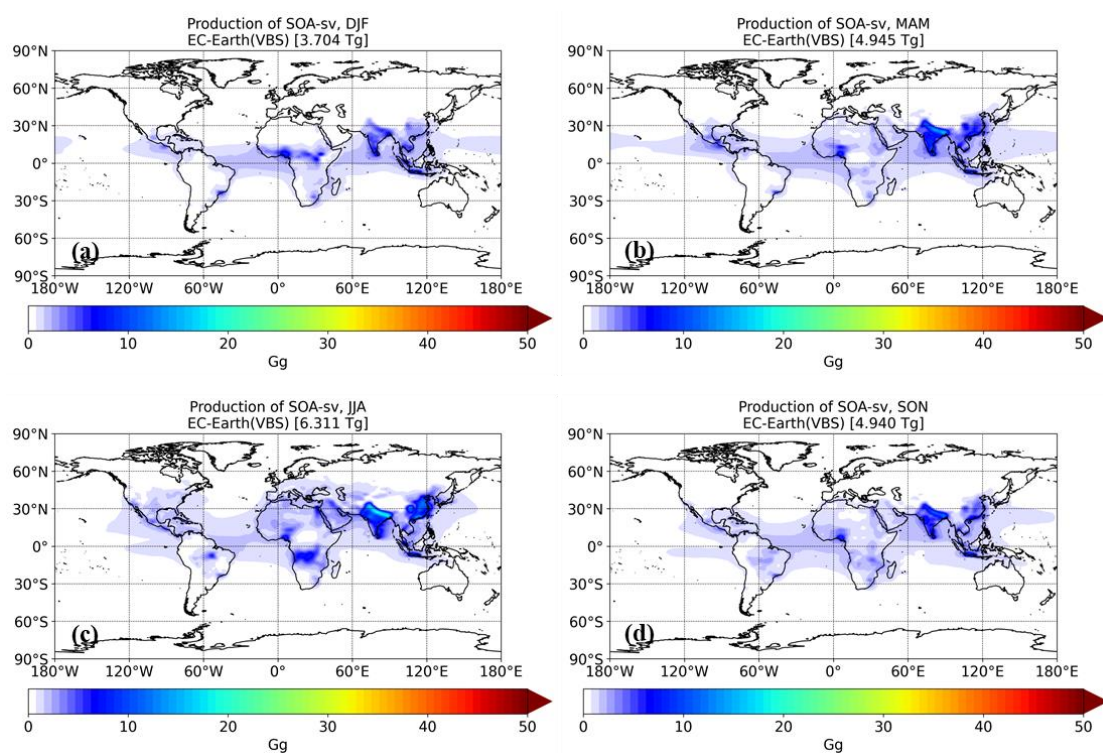

**Figure S5.** Production of SOA-sv as simulated using the VBS configuration of EC-Earth during 2005 (in Gg) for: (a) DJF, (b) MAM, (c) JJA, and (d) SON.

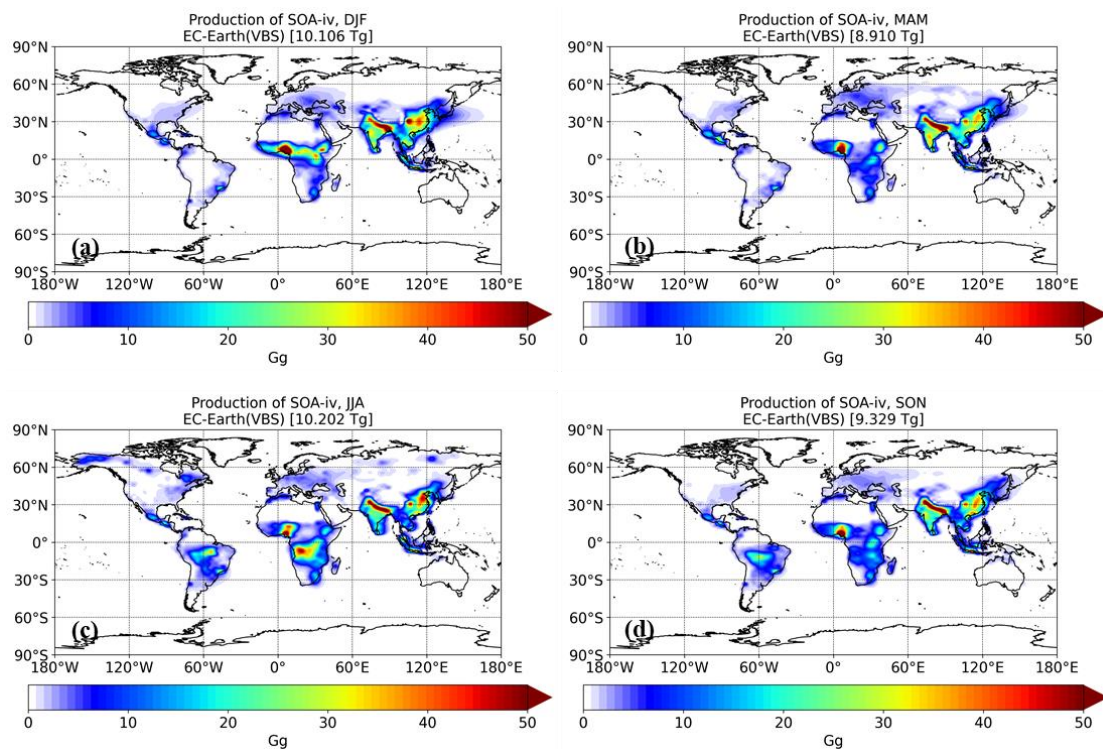

**Figure S6.** Production of SOA-iv as simulated using the VBS configuration of EC-Earth during 2005 (in Gg) for: (a) DJF, (b) MAM, (c) JJA, and (d) SON.



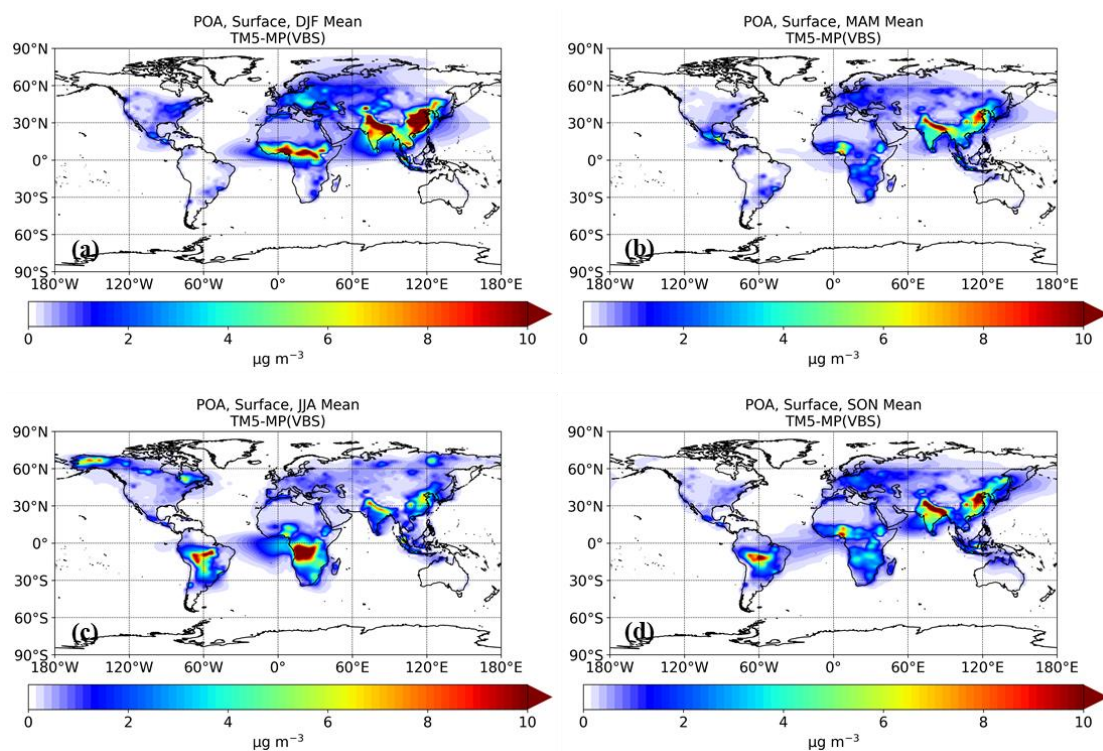

**Figure S7.** Mean surface concentrations of POA (in  $\mu\text{g m}^{-3}$ ) during: (a) DJF, (b) MAM, (c) JJA, and (d) SON simulated using the VBS configuration in TM5-MP.

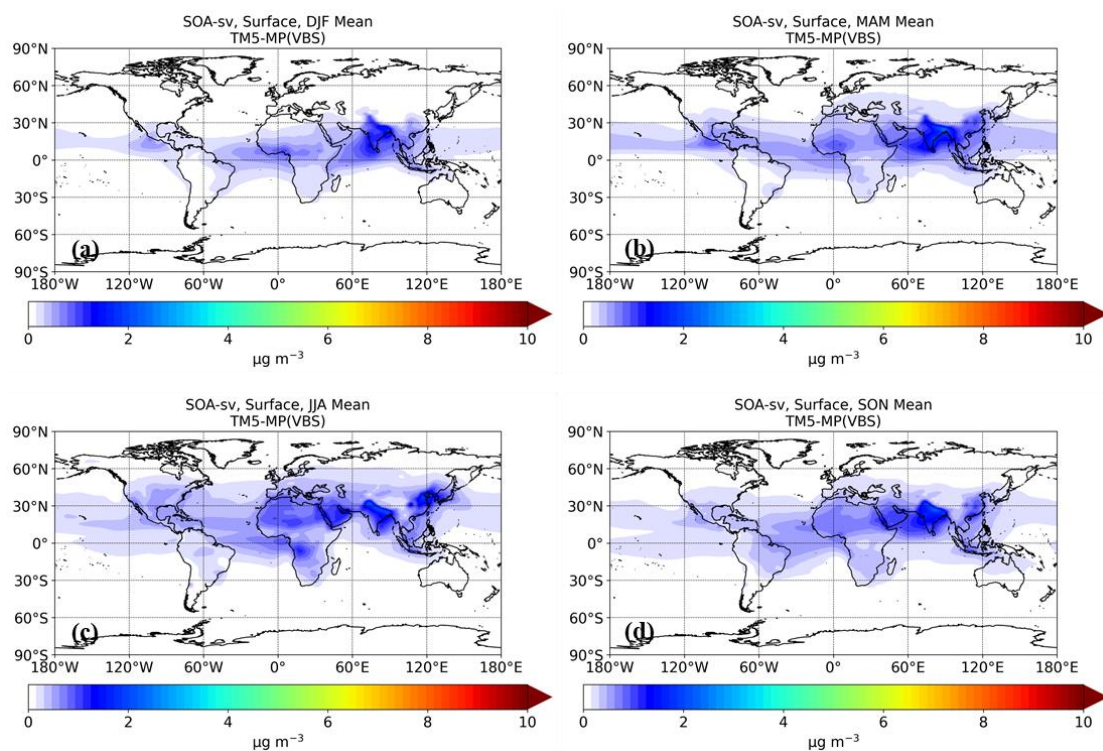

**Figure S8.** Mean surface concentrations of SOA-sv (in  $\mu\text{g m}^{-3}$ ) during: (a) DJF, (b) MAM, (c) JJA, and (d) SON simulated using the VBS configuration in TM5-MP.

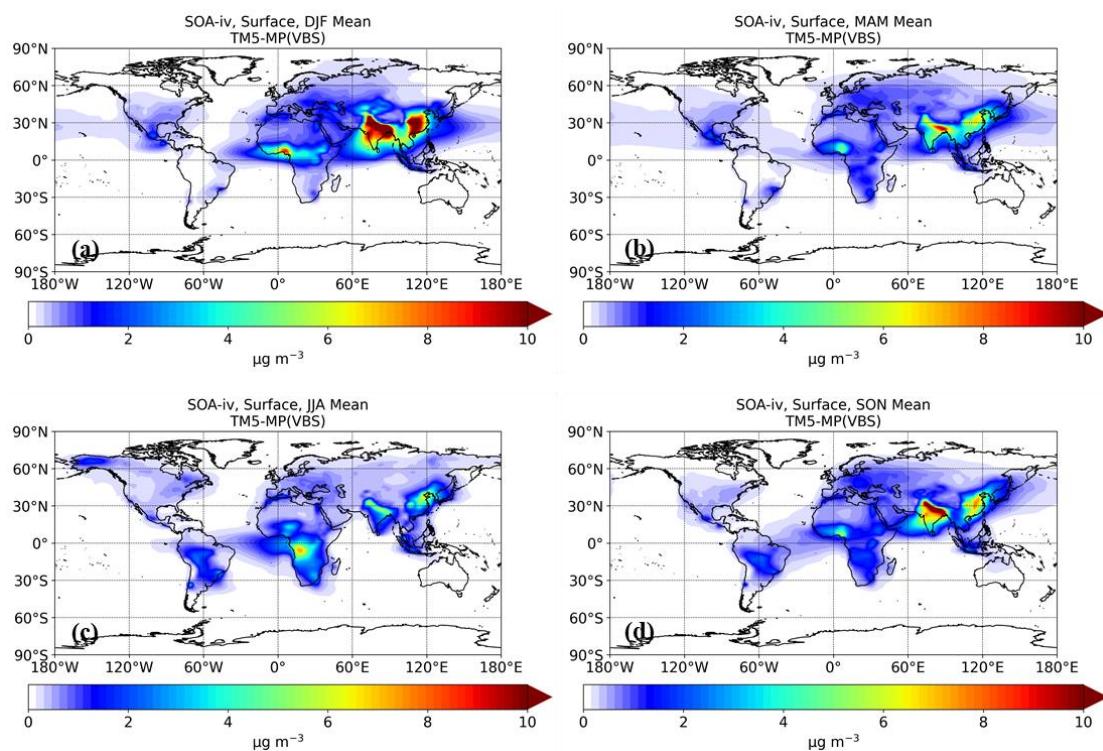

**Figure S9.** Mean surface concentrations of SOA-iv (in  $\mu\text{g m}^{-3}$ ) during: (a) DJF, (b) MAM, (c) JJA, and (d) SON simulated using the VBS configuration in TM5-MP.

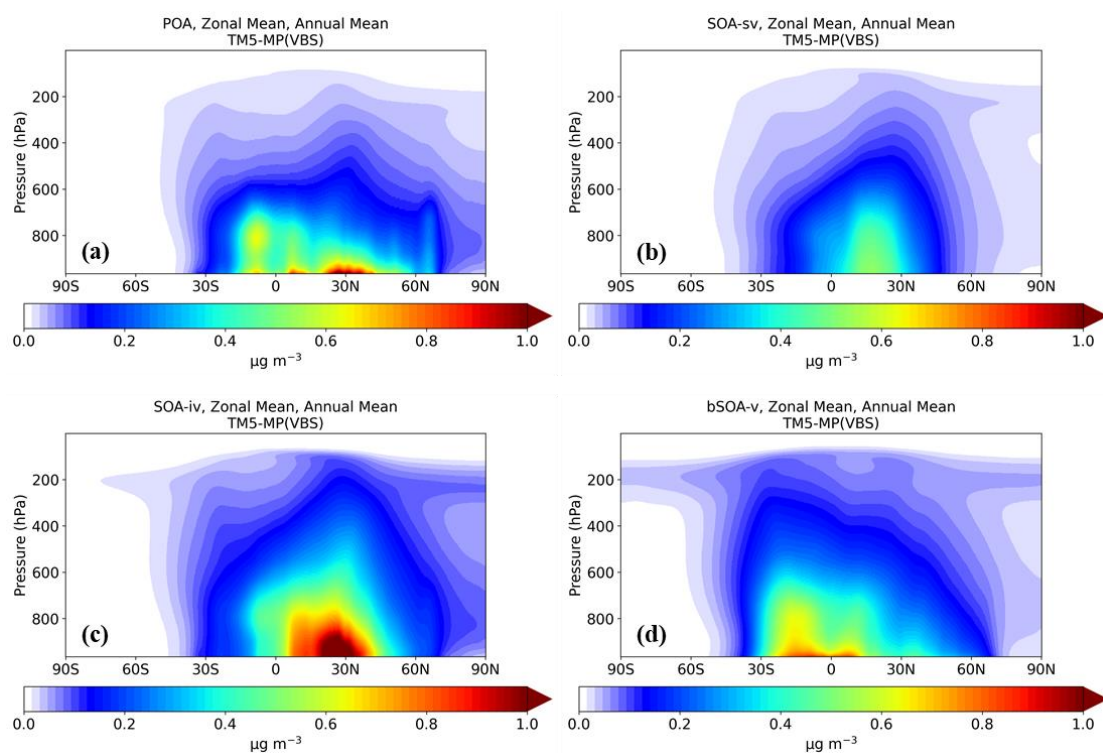

**Figure S10.** Annual mean zonal concentrations (in  $\mu\text{g m}^{-3}$ ) of: (a) POA, (b) SOA-sv, and (c) SOA-iv simulated using the VBS configuration in TM5-MP. For completeness, bSOA-v in panel (d) is also shown.



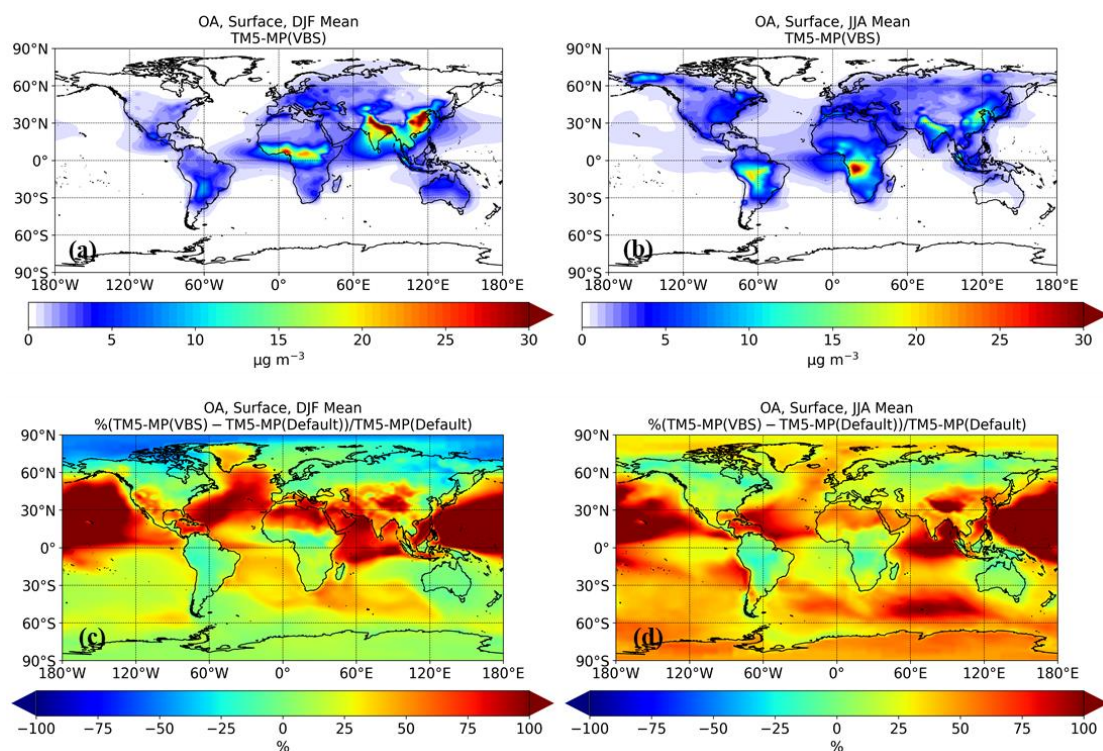

**Figure S11.** Mean concentrations of total organic aerosol (in  $\mu\text{g m}^{-3}$ ) during: **(a)** DJF, and **(b)** JJA, simulated using the VBS configuration in TM5-MP. Panels **(c)** and **(d)** show the corresponding relative differences (in %) compared to the previous (default) model configuration. A positive change indicates that the VBS configuration predicts more than the default one.



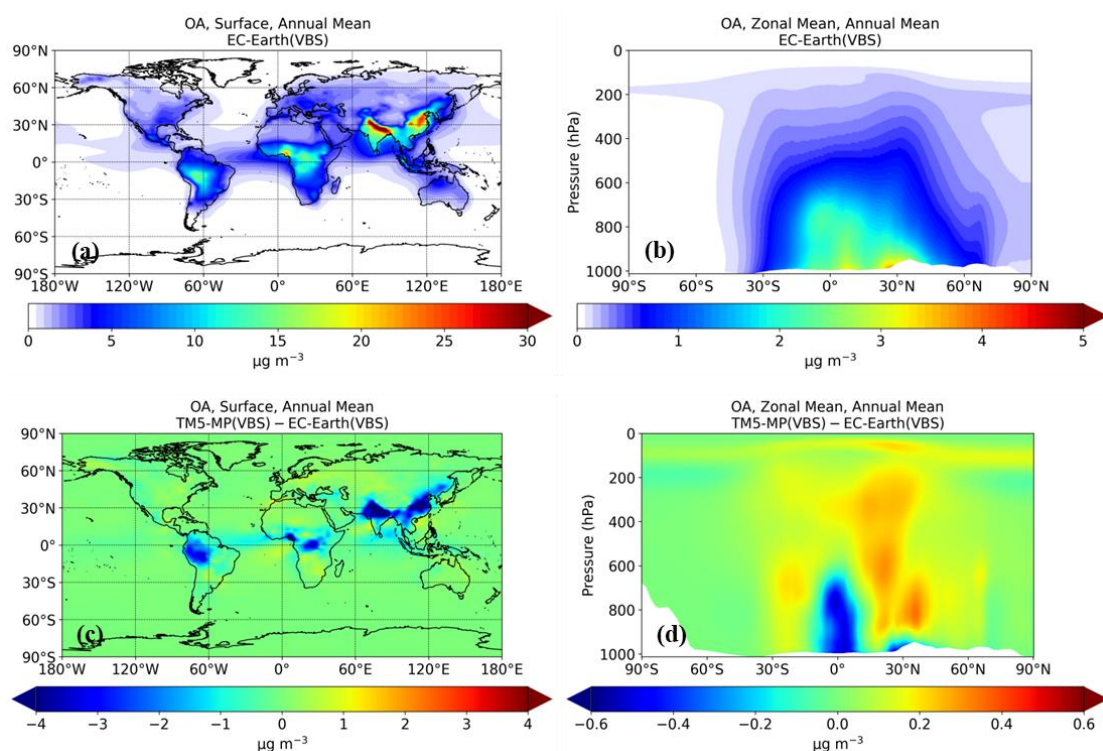

**Figure S12.** Annual mean concentrations of total organic aerosol (in  $\mu\text{g m}^{-3}$ ): **(a)** surface concentrations, and **(b)** zonal values as simulated using the VBS configuration of EC-Earth during 2005. Panels **(c)** and **(d)** show the corresponding differences (in  $\mu\text{g m}^{-3}$ ) compared to the TM5-MP predictions using the VBS configuration. A positive change indicates that the standalone TM5-MP simulation predicts higher concentrations than the EC-Earth.

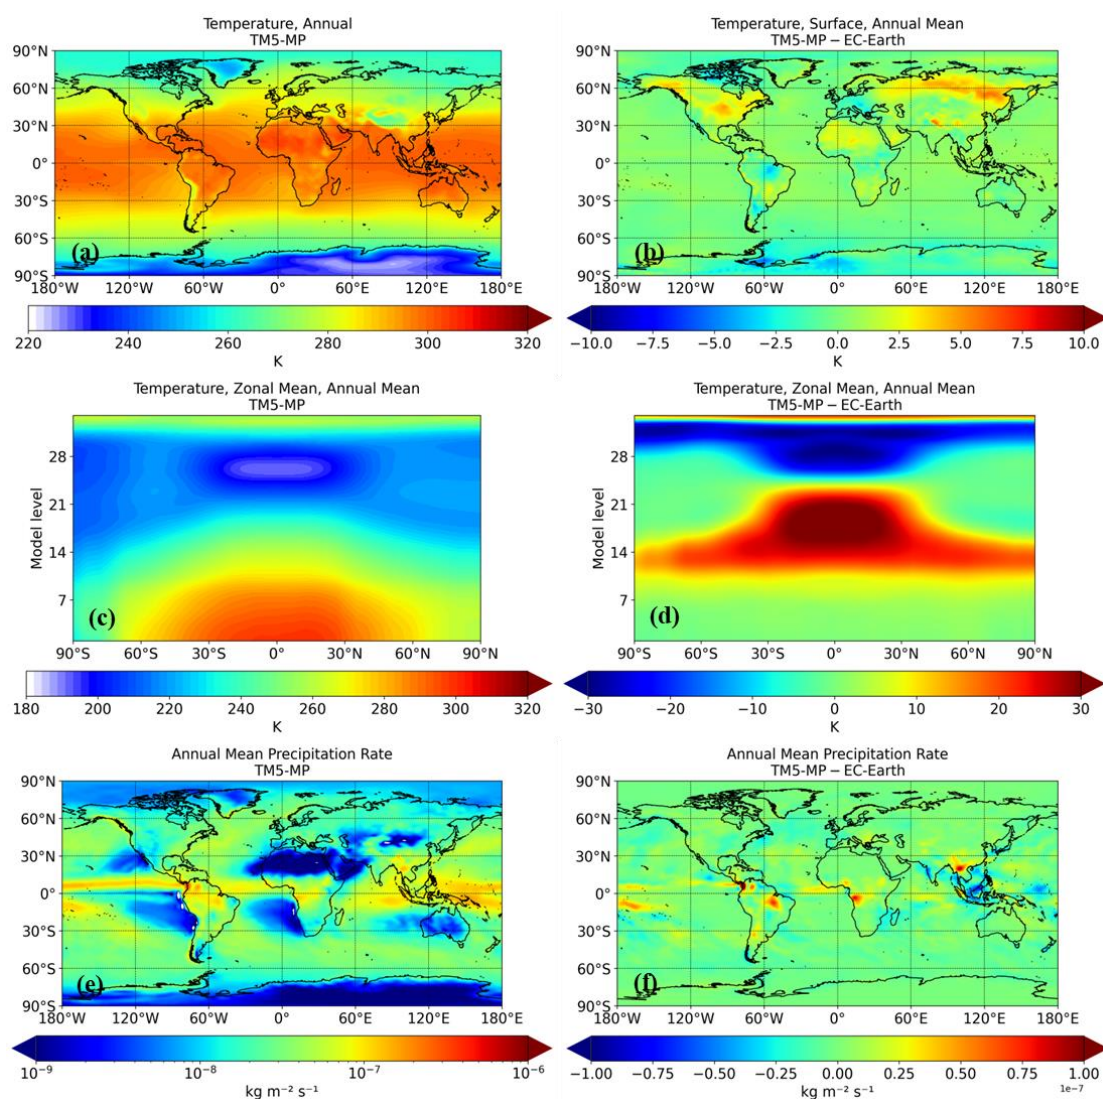

**Figure S13.** Meteorological fields from TM5-MP and their differences with EC-Earth for: **(a)**, **(b)** annual mean surface temperature (in K), **(c)**, **(d)** annual zonal-mean temperature (in K), and **(e)**, **(f)** annual mean precipitation rate ( $\text{kg m}^{-2} \text{s}^{-1}$ ) for 2005. A positive change indicates that the standalone TM5-MP model accounts for higher values than the simulated of EC-Earth.
